# Supplementary material for: Molybdenum Disulfide-Integrated Iron Organic Framework Hybrid Nanozyme-Based Aptasensor for Colorimetric Detection of Exosomes
Source: MDPI journal article supplement (doi:10.3390/bios13080800), 2023-08-09
Supplement: s1 [file s1]

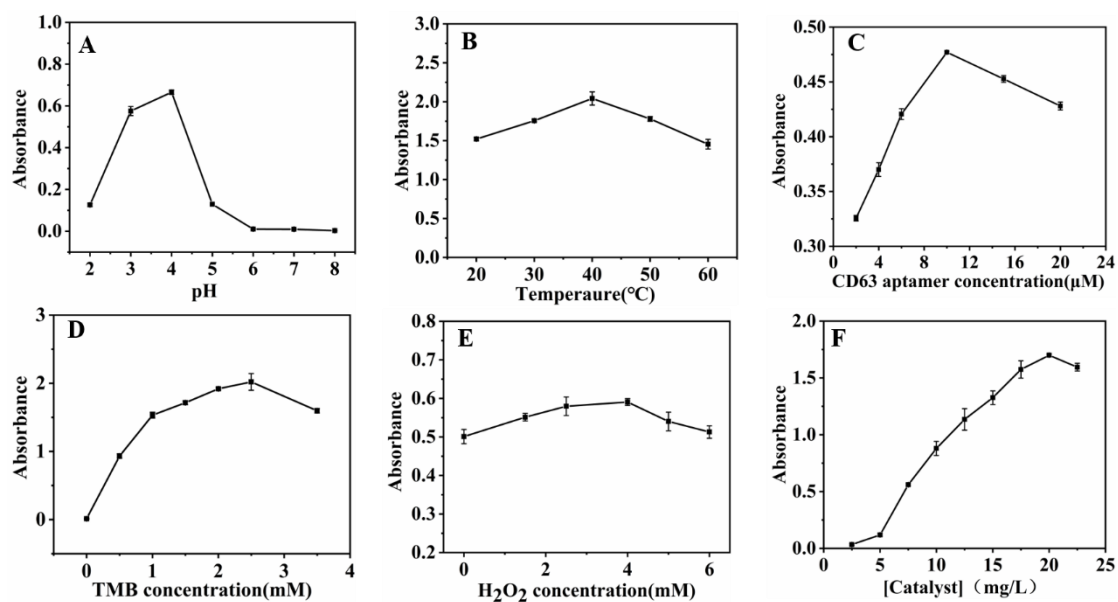

**Figure S1.** Influences of (A) pH, (B) temperature, (C) aptamer concentration, (D) TMB concentration, (E) H<sub>2</sub>O<sub>2</sub> concentration, (F) MoS<sub>2</sub>-MIL-101(Fe) concentration for the MoS<sub>2</sub>-MIL-101(Fe) hybrid nanozyme-based aptasensor.

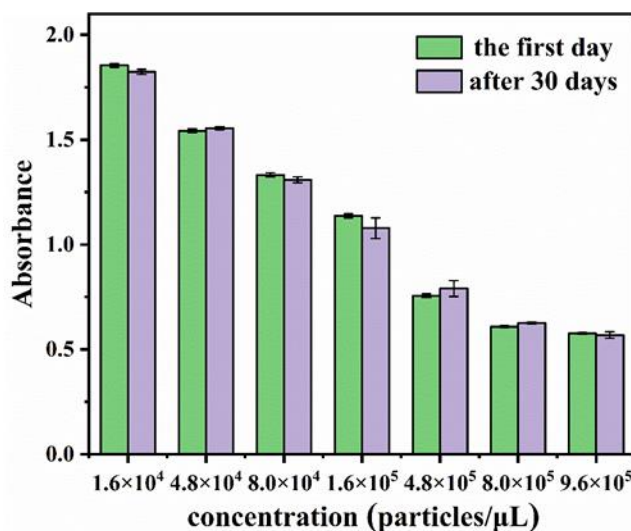

**Figure S2.** Comparison of absorbances between measurement at first-day synthesis and measurement after 30-day storage at 4 °C with the same concentration of exosomes. Each column exhibited the average value of three independent data with an error bar presented.

**Table S1.** Detection of HGC-7901-derived exosomes in human serum.

| Sample Number | Added (Particles/μL) | Found (Particles/μL) | Recovery (%) | RSD (%) (n = 3) |
|---------------|----------------------|----------------------|--------------|-----------------|
| 1             | $1.60 \times 10^4$   | $1.54 \times 10^4$   | 103          | 0.1             |
| 2             | $4.80 \times 10^4$   | $4.65 \times 10^4$   | 97           | 4.4             |
| 3             | $8.00 \times 10^4$   | $7.86 \times 10^4$   | 98           | 2.3             |
| 4             | $1.60 \times 10^5$   | $1.65 \times 10^5$   | 103          | 5.0             |
| 5             | $9.60 \times 10^5$   | $9.12 \times 10^5$   | 95           | 2.2             |
